# Supplementary material for: Molecular Identification of Commercialized Medicinal Plants in Southern Morocco
Source: PubMed Central journal article supplement (PMC3384669; doi:10.1371/journal.pone.0039459), 2012-06-27

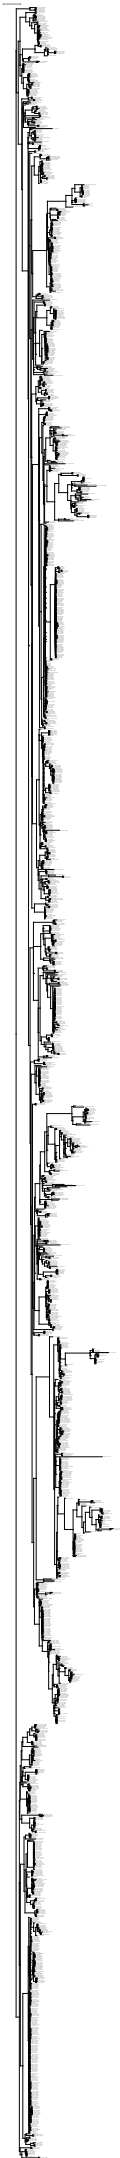

Supplement: pone.0039459.s004.pdf [file pone.0039459.s004.pdf]
